# Supplementary material
Source: PubMed Central journal article supplement (PMC4309706)
Supplement: AEM.03392-14_zam999116011so1.pdf [file AEM.03392-14_zam999116011so1.pdf]

**Table S1.** *Staphylococcus aureus* and MRSA loads (CFU) in 1075 pig nasal swabs originating from 15 MRSA-positive farms.

| <i>S. aureus</i> load* |   | MRSA load* |       |       |       |       | Total |
|------------------------|---|------------|-------|-------|-------|-------|-------|
|                        |   | 0          | A     | B     | C     | D     |       |
| <b>0</b>               | n | 390        | 30    | 7     | 1     | 0     | 428   |
|                        | % | 91.12      | 7.01  | 1.64  | 0.23  | 0.00  |       |
| <b>A</b>               | n | 140        | 143   | 7     | 0     | 0     | 290   |
|                        | % | 48.28      | 49.31 | 2.41  | 0.00  | 0.00  |       |
| <b>B</b>               | n | 100        | 56    | 80    | 1     | 0     | 237   |
|                        | % | 42.19      | 23.63 | 33.76 | 0.42  | 0.00  |       |
| <b>C</b>               | n | 28         | 24    | 18    | 19    | 0     | 89    |
|                        | % | 31.46      | 26.97 | 20.22 | 21.35 | 0.00  |       |
| <b>D</b>               | n | 10         | 6     | 4     | 5     | 6     | 31    |
|                        | % | 32.26      | 19.35 | 12.90 | 16.13 | 19.35 |       |
| <b>Total</b>           |   | 668        | 259   | 116   | 26    | 6     | 1075  |

\* Nasal loads were categorized as 0 (<100 CFUs), A ( $\geq 100$  and <1000), B ( $\geq 1000$  and < 10000), C ( $\geq 10000$  and <100000) and D ( $\geq 100000$  CFUs).

**Table S2.** Correlation between IgG levels against ten *Staphylococcus aureus*-specific antigens and five random effects. Random effects associated to the environment (*farm*, *pen* and *farmpen*) were the only significant effects in linear regression analysis.

| <i>S. aureus</i>               |                   |               |                   |                 |               | <i>Significance</i> |
|--------------------------------|-------------------|---------------|-------------------|-----------------|---------------|---------------------|
| <i>antigens</i>                |                   |               |                   |                 |               | <i>in linear</i>    |
| <b>(Function)</b>              | <i>farm</i>       | <i>pen</i>    | <i>farmpen</i>    | <i>totalpig</i> | <i>pig</i>    | <i>regression</i>   |
| <b>ClfA</b>                    | 0.32238           | 0.22692       | 0.32892           | 0.26830         | 0.16485       | <i>farmpen</i>      |
| <b>(Adhesion)</b>              | <b>&lt;0.0001</b> | <b>0.0036</b> | <b>&lt;0.0001</b> | <b>0.0005</b>   | <b>0.0355</b> |                     |
| <b>IsdA</b>                    | 0.28514           | 0.08372       | 0.22819           | 0.15229         | 0.07811       | <i>farm</i>         |
| <b>(Adhesion)</b>              | <b>&lt;0.0001</b> | 0.2572        | <b>0.0018</b>     | <b>0.0385</b>   | 0.2906        |                     |
| <b>SdrD</b>                    | 0.07870           | 0.12511       | 0.13425           | 0.09542         | 0.05621       | None                |
| <b>(Adhesion)</b>              | 0.2950            | 0.0952        | 0.0732            | 0.2039          | 0.4548        |                     |
| <b><math>\alpha</math>-tox</b> | 0.19378           | 0.12722       | 0.19223           | 0.10612         | 0.04016       | <i>farmpen</i>      |
| <b>(Toxin)</b>                 | <b>0.0121</b>     | 0.1014        | <b>0.0128</b>     | 0.1723          | 0.6063        |                     |
| <b>HlgB</b>                    | 0.19170           | -0.00064      | 0.11452           | 0.02307         | -0.06380      | <i>farm</i>         |
| <b>(Toxin)</b>                 | <b>0.0131</b>     | 0.9935        | 0.1406            | 0.7672          | 0.4127        |                     |
| <b>LytM</b>                    | 0.03724           | 0.09966       | 0.07985           | 0.00617         | -0.02405      | None                |
| <b>(Toxin)</b>                 | 0.6109            | 0.1724        | 0.2747            | 0.9329          | 0.7426        |                     |
| <b>SEI</b>                     | -0.02287          | 0.01813       | 0.00702           | -0.03239        | -0.04399      | None                |
| <b>(Toxin)</b>                 | 0.7510            | 0.8013        | 0.9224            | 0.6530          | 0.5414        |                     |
| <b>SSL-1</b>                   | 0.24617           | 0.24418       | 0.29202           | 0.26586         | 0.21922       | <i>farmpen</i>      |
| <b>(Toxin)</b>                 | <b>0.0012</b>     | <b>0.0013</b> | <b>0.0001</b>     | <b>0.0004</b>   | <b>0.0040</b> |                     |
| <b>SSL-5</b>                   | 0.12372           | 0.09390       | 0.12169           | 0.04156         | -0.00089      | None                |
| <b>(Toxin)</b>                 | 0.0873            | 0.1951        | 0.0927            | 0.5670          | 0.9902        |                     |
| <b>TSST-1</b>                  | 0.25840           | 0.05158       | 0.18107           | 0.15384         | 0.09632       | <i>farm</i>         |
| <b>(Toxin)</b>                 | <b>0.0005</b>     | 0.4942        | <b>0.0156</b>     | <b>0.0403</b>   | 0.2009        |                     |
